# Supplementary material for: Intercellular interactions between mast cells and stromal fibroblasts obtained from canine cutaneous mast cell tumours
Source: PubMed Central journal article supplement (PMC8668961; doi:10.1038/s41598-021-03390-w), 2021-12-13
Supplement: 41598_2021_3390_MOESM1_ESM.pdf [file 41598_2021_3390_MOESM1_ESM.pdf]

## SUPPLEMENTARY MATERIALS

### TABLES

Table S1. Summary of Clinical and Histopathological data of 14 tumours obtained from 12 dogs with MCTs submitted to the coculture and transwell analyses. Breed, age, gender, location of the lesions and histopathological grades, with their respective identification number. Sample 401-18 was not used for the assessment of cell viability along passages.

| <b>SAMPLE ID</b>      | <b>BREED</b>          | <b>AGE (years)</b> | <b>GENDER</b> | <b>TUMOR LOCATION</b> | <b>GRADE [27]</b> |
|-----------------------|-----------------------|--------------------|---------------|-----------------------|-------------------|
| 5/16 <sup>a</sup>     | mixed breed           | 8                  | male          | trunk                 | Low-grade         |
| 6/16 <sup>a</sup>     | mixed breed           | 8                  | male          | limbs and tail        | Low-grade         |
| 346-16                | Labrador              | 5                  | female        | trunk                 | Low-grade         |
| 19-18                 | Labrador              | 6                  | male          | limbs and tail        | Low-grade         |
| 1171-18 <sup>b*</sup> | mixed breed           | 9                  | female        | trunk                 | Low-grade         |
| 1172-18 <sup>b</sup>  | mixed breed           | 9                  | female        | trunk                 | Low-grade         |
| 1249-18*              | Australian Cattle Dog | 3                  | female        | head                  | Low-grade         |
| 232-16                | mixed breed           | 4                  | female        | abdomen               | High-grade        |
| 334-16                | mixed breed           | 10                 | male          | inguinal              | High-grade        |
| 395-17                | mixed breed           | 7                  | male          | limbs and tail        | High-grade        |
| 550-17*               | Boxer                 | 10                 | female        | abdomen               | High-grade        |
| 603-17                | Brazilian Terrier     | 14                 | female        | limbs and tail        | High-grade        |
| 816-18                | Boxer                 | 6                  | female        | limbs and tail        | High-grade        |
| 401-18*               | Brazilian Terrier     | 9                  | male          | limb                  | High-grade        |

ID = identification number in the pathology laboratory.

<sup>a,b</sup> lesions from the same patient

\* tumour which primary cells were used for co-culture experiments

Table S2. Neoplastic mast cell quantification in the supernatant. Sample H05-16.

| Date       | Days of cultivation | Passage | N° of live cells in the supernatant/ml | N° of dead cells in the supernatant/ml | Total (live and death) cells/ml | Percentage of viable cells |
|------------|---------------------|---------|----------------------------------------|----------------------------------------|---------------------------------|----------------------------|
| 20/01/2016 | 0                   | P0      | 690000                                 | 60000                                  | 750000                          | 92.0%                      |
| 29/01/2016 | 9                   | P1      | 285000                                 | 160000                                 | 445000                          | 64.0%                      |
| 04/02/2016 | 15                  | P2      | 140000                                 | 180000                                 | 320000                          | 43.7%                      |
| 12/02/2016 | 23                  | P3      | 75000                                  | 115000                                 | 190000                          | 39.4%                      |
| 19/02/2016 | 30                  | P4      | 56000                                  | 133000                                 | 189000                          | 29.6%                      |
| 26/02/2016 | 37                  | P5      | 30000                                  | 143000                                 | 173000                          | 17.3%                      |
| 06/03/2016 | 46                  | P6      | 25000                                  | 192000                                 | 217000                          | 11.5%                      |
| 04/04/2016 | 74                  | P7      | 0                                      | *                                      | *                               | 0.0%                       |

Table S3. Neoplastic mast cell quantification in the supernatant. Sample H06-16.

| Date       | Days of cultivation | Passage | N° of live cells in the supernatant/ml | N° of dead cells in the supernatant/ml | Total (live and death) cells/ml | Percentage of viable cells |
|------------|---------------------|---------|----------------------------------------|----------------------------------------|---------------------------------|----------------------------|
| 20/01/2016 | 0                   | P0      | 580000                                 | 30000                                  | 610000                          | 95.1%                      |
| 29/01/2016 | 9                   | P1      | 290000                                 | 105000                                 | 395000                          | 73.4%                      |
| 04/02/2016 | 15                  | P2      | 110000                                 | 155000                                 | 265000                          | 41.5%                      |
| 12/02/2016 | 23                  | P3      | 87000                                  | 220000                                 | 307000                          | 28.3%                      |
| 19/02/2016 | 30                  | P4      | 50000                                  | 255000                                 | 305000                          | 16.4%                      |
| 26/02/2016 | 37                  | P5      | 20000                                  | 160000                                 | 180000                          | 11.1%                      |
| 06/03/2016 | 46                  | P6      | 10000                                  | 140000                                 | 150000                          | 6.7%                       |
| 04/04/2016 | 74                  | P7      | 0                                      | *                                      | *                               | 0.0%                       |

Table S4. Neoplastic mast cell quantification in the supernatant. Sample H346-16.

| Date       | Days of cultivation | Passage | N° of live cells in the supernatant/ml | N° of dead cells in the supernatant/ml | Total (live and death) cells/ml | Percentage of viable cells |
|------------|---------------------|---------|----------------------------------------|----------------------------------------|---------------------------------|----------------------------|
| 19/07/2016 | 0                   | P0      | 2800000                                | 150000                                 | 2950000                         | 94.9%                      |
| 26/07/2016 | 7                   | P1      | 1100000                                | 450000                                 | 1550000                         | 71.0%                      |
| 06/08/2016 | 18                  | P2      | 850000                                 | 1200000                                | 2050000                         | 41.5%                      |
| 13/08/2016 | 25                  | P3      | 560000                                 | 1600000                                | 2160000                         | 25.9%                      |
| 22/08/2016 | 34                  | P4      | 250000                                 | 800000                                 | 1050000                         | 23.8%                      |
| 12/09/2016 | 55                  | P5      | 180000                                 | 900000                                 | 1080000                         | 16.7%                      |
| 21/09/2016 | 64                  | P6      | 100000                                 | 900000                                 | 1000000                         | 10.0%                      |
| 28/09/2016 | 71                  | P7      | 0                                      | *                                      | *                               | 0.0%                       |

Table S5. Neoplastic mast cell quantification in the supernatant. Sample H19-18.

| Date       | Days of cultivation | Passage | N° of live cells in the supernatant/ml | N° of dead cells in the supernatant/ml | Total (live and death) cells/ml | Percentage of viable cells |
|------------|---------------------|---------|----------------------------------------|----------------------------------------|---------------------------------|----------------------------|
| 06/02/2018 | 0                   | P0      | 2130000                                | 27000                                  | 2157000                         | 98.7%                      |
| 14/02/2018 | 8                   | P1      | 1900000                                | 180000                                 | 2080000                         | 91.3%                      |
| 23/02/2018 | 17                  | P2      | 1400000                                | 780000                                 | 2180000                         | 64.2%                      |
| 06/03/2018 | 30                  | P3      | 950000                                 | 990000                                 | 1940000                         | 49.0%                      |
| 16/03/2018 | 40                  | P4      | 610000                                 | 1070000                                | 1680000                         | 36.3%                      |
| 27/03/2018 | 51                  | P5      | 380000                                 | 1250000                                | 1630000                         | 23.3%                      |
| 17/04/2018 | 61                  | P6      | 85000                                  | 1300000                                | 1385000                         | 6.1%                       |
| 01/05/2018 | 75                  | P7      | 0                                      | *                                      | *                               | 0.0%                       |

Table S6. Neoplastic mast cell quantification in the supernatant. Sample H1171-18.

| Date       | Days of cultivation | Passage | N° of live cells in the supernatant/ml | N° of dead cells in the supernatant/ml | Total (live and death) cells/ml | Percentage of viable cells |
|------------|---------------------|---------|----------------------------------------|----------------------------------------|---------------------------------|----------------------------|
| 22/08/2018 | 0                   | P0      | 775000                                 | 26000                                  | 801000                          | 96.7%                      |
| 31/08/2018 | 9                   | P1      | 615000                                 | 280000                                 | 895000                          | 68.7%                      |
| 10/09/2018 | 19                  | P2      | 440000                                 | 370000                                 | 810000                          | 54.3%                      |
| 18/09/2018 | 27                  | P3      | 195000                                 | 405000                                 | 600000                          | 32.5%                      |
| 27/09/2018 | 36                  | P4      | 125000                                 | 435000                                 | 560000                          | 22.3%                      |
| 13/10/2018 | 52                  | P5      | 45000                                  | 415000                                 | 460000                          | 9.8%                       |
| 24/10/2018 | 63                  | P6      | 0                                      | *                                      | *                               | 0.0%                       |

Table S7. Neoplastic mast cell quantification in the supernatant. Sample H1172-18.

| Date       | Days of cultivation | Passage | N° of live cells in the supernatant/ml | N° of dead cells in the supernatant/ml | Total (live and death) cells/ml | Percentage of viable cells |
|------------|---------------------|---------|----------------------------------------|----------------------------------------|---------------------------------|----------------------------|
| 22/08/2018 | 0                   | P0      | 550000                                 | 78000                                  | 628000                          | 87.6%                      |
| 31/08/2018 | 9                   | P1      | 480000                                 | 140000                                 | 620000                          | 77.4%                      |
| 10/09/2018 | 19                  | P2      | 370000                                 | 395000                                 | 765000                          | 48.4%                      |
| 18/09/2018 | 27                  | P3      | 230000                                 | 480000                                 | 710000                          | 32.4%                      |
| 27/09/2018 | 36                  | P4      | 125000                                 | 520000                                 | 645000                          | 19.4%                      |
| 13/10/2018 | 52                  | P5      | 40000                                  | 435000                                 | 475000                          | 8.4%                       |
| 24/10/2018 | 63                  | P6      | 0                                      | *                                      | *                               | 0.0%                       |

Table S8. Neoplastic mast cell quantification in the supernatant. Sample H1249-18.

| Date       | Days of cultivation | Passage | N° of live cells in the supernatant/ml | N° of dead cells in the supernatant/ml | Total (live and death) cells/ml | Percentage of viable cells |
|------------|---------------------|---------|----------------------------------------|----------------------------------------|---------------------------------|----------------------------|
| 01/09/2018 | 0                   | P0      | 800000                                 | 90000                                  | 890000                          | 89.9%                      |
| 14/09/2018 | 14                  | P1      | 610000                                 | 290000                                 | 900000                          | 67.7%                      |
| 24/09/2018 | 24                  | P2      | 420000                                 | 550000                                 | 970000                          | 43.3%                      |
| 03/10/2018 | 33                  | P3      | 310000                                 | 580000                                 | 890000                          | 43.8%                      |
| 13/10/2018 | 43                  | P4      | 115000                                 | 680000                                 | 795000                          | 14.6%                      |
| 22/10/2018 | 52                  | P5      | 50000                                  | 890000                                 | 940000                          | 5.3%                       |
| 03/11/2018 | 64                  | P6      | 0                                      | *                                      | *                               | 0.0%                       |

Table S9. Neoplastic mast cell quantification in the supernatant. Sample H232-16.

| Date       | Days of cultivation | Passage | N° of live cells in the supernatant/ml | N° of dead cells in the supernatant/ml | Total (live and death) cells/ml | Percentage of viable cells |
|------------|---------------------|---------|----------------------------------------|----------------------------------------|---------------------------------|----------------------------|
| 30/04/2016 | 0                   | P0      | 1100000                                | 85000                                  | 1185000                         | 92.8%                      |
| 06/05/2016 | 6                   | P1      | 630000                                 | 360000                                 | 990000                          | 63.6%                      |
| 16/05/2016 | 16                  | P2      | 330000                                 | 510000                                 | 840000                          | 39.3%                      |
| 24/05/2016 | 24                  | P3      | 87000                                  | 720000                                 | 807000                          | 10.8%                      |
| 30/05/2016 | 30                  | P4      | 57500                                  | 750000                                 | 807500                          | 7.1%                       |
| 06/06/2016 | 36                  | P5      | 0                                      | *                                      | *                               | 0.0%                       |

Table S10. Neoplastic mast cell quantification in the supernatant. Sample H334-16.

| Date       | Days of cultivation | Passage | N° of live cells in the supernatant/ml | N° of dead cells in the supernatant/ml | Total (live and death) cells/ml | Percentage of viable cells |
|------------|---------------------|---------|----------------------------------------|----------------------------------------|---------------------------------|----------------------------|
| 24/06/2016 | 0                   | P0      | 890000                                 | 70000                                  | 960000                          | 92.7%                      |
| 04/07/2016 | 12                  | P1      | 565000                                 | 150000                                 | 715000                          | 79.0%                      |
| 09/07/2016 | 17                  | P2      | 470000                                 | 425000                                 | 895000                          | 52.5%                      |
| 18/07/2016 | 26                  | P3      | 205000                                 | 550000                                 | 755000                          | 27.1%                      |
| 26/07/2016 | 34                  | P4      | 125000                                 | 635000                                 | 760000                          | 16.4%                      |
| 04/08/2016 | 42                  | P5      | 0                                      | *                                      | *                               | 0.0%                       |

Table S11. Neoplastic mast cell quantification in the supernatant. Sample H395-17.

| Date       | Days of cultivation | Passage | N° of live cells in the supernatant/ml | N° of dead cells in the supernatant/ml | Total (live and death) cells/ml | Percentage of viable cells |
|------------|---------------------|---------|----------------------------------------|----------------------------------------|---------------------------------|----------------------------|
| 11/05/2017 | 0                   | P0      | 1800000                                | 5000                                   | 1805000                         | 99.7%                      |
| 20/05/2017 | 9                   | P1      | 1460000                                | 505000                                 | 1965000                         | 74.3%                      |
| 29/05/2017 | 18                  | P2      | 980000                                 | 840000                                 | 1820000                         | 53.8%                      |
| 09/06/2017 | 29                  | P3      | 746000                                 | 786000                                 | 1532000                         | 48.7%                      |
| 18/06/2017 | 38                  | P4      | 478000                                 | 950000                                 | 1428000                         | 33.5%                      |
| 23/06/2017 | 43                  | P5      | 150000                                 | 800000                                 | 950000                          | 15.8%                      |
| 30/06/2017 | 50                  | P6      | 0                                      | *                                      | *                               | 0.0%                       |

Table S12. Neoplastic mast cell quantification in the supernatant. Sample H550-17.

| Date       | Days of cultivation | Passage | N° of live cells in the supernatant/ml | N° of dead cells in the supernatant/ml | Total (live and death) cells/ml | Percentage of viable cells |
|------------|---------------------|---------|----------------------------------------|----------------------------------------|---------------------------------|----------------------------|
| 10/07/2017 | 0                   | P0      | 1700000                                | 10500                                  | 1710500                         | 99.4%                      |
| 17/07/2017 | 7                   | P1      | 985000                                 | 690000                                 | 1675000                         | 58.80%                     |
| 22/07/2017 | 12                  | P2      | 420000                                 | 1040000                                | 1460000                         | 28.7%                      |
| 01/08/2017 | 22                  | P3      | 126000                                 | 1370000                                | 1496000                         | 8.4%                       |
| 09/08/2017 | 30                  | P4      | 0                                      | *                                      | *                               | 0.00%                      |

Table S13. Neoplastic mast cell quantification in the supernatant. Sample H603-17.

| Date       | Days of cultivation | Passage | N° of live cells in the supernatant/ml | N° of dead cells in the supernatant/ml | Total (live and death) cells/ml | Percentage of viable cells |
|------------|---------------------|---------|----------------------------------------|----------------------------------------|---------------------------------|----------------------------|
| 19/10/2017 | 0                   | P0      | 3200000                                | 245000                                 | 3445000                         | 92.9%                      |
| 30/10/2017 | 11                  | P1      | 1750000                                | 1096000                                | 2846000                         | 61.5%                      |
| 10/11/2017 | 22                  | P2      | 960000                                 | 1230000                                | 2190000                         | 43.80%                     |
| 18/11/2017 | 30                  | P3      | 365000                                 | 1130000                                | 1495000                         | 24.40%                     |
| 24/11/2017 | 36                  | P4      | 0                                      | *                                      | *                               | 0.00%                      |

Table S14. Neoplastic mast cell quantification in the supernatant. Sample H816-18.

| <b>Date</b> | <b>Days of cultivation</b> | <b>Passage</b> | <b>N° of live cells in the supernatant/ml</b> | <b>N° of dead cells in the supernatant/ml</b> | <b>Total (live and death) cells/ml</b> | <b>Percentage of viable cells</b> |
|-------------|----------------------------|----------------|-----------------------------------------------|-----------------------------------------------|----------------------------------------|-----------------------------------|
| 21/07/2018  | 0                          | P0             | 1800000                                       | 25000                                         | 1825000                                | 98.6%                             |
| 31/07/2018  | 10                         | P1             | 1020000                                       | 149500                                        | 1169500                                | 87.2%                             |
| 10/08/2018  | 21                         | P2             | 620000                                        | 350000                                        | 970000                                 | 63.9%                             |
| 20/08/2018  | 31                         | P3             | 415000                                        | 615000                                        | 1030000                                | 40.3%                             |
| 27/08/2018  | 38                         | P4             | 120000                                        | 760000                                        | 880000                                 | 13.6%                             |
| 03/09/2018  | 45                         | P5             | 0                                             | *                                             | *                                      | 0.0%                              |

## FIGURES

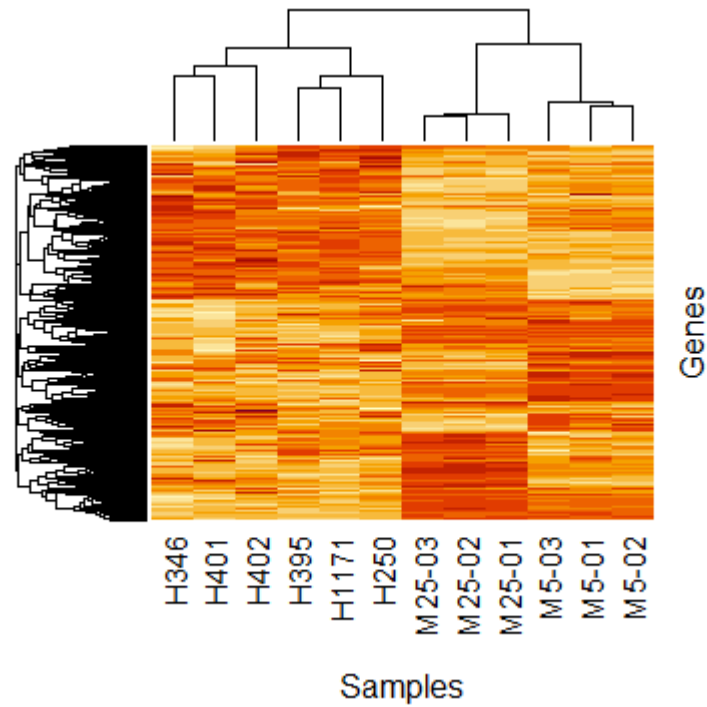

Figure S1. Hierarchical clustering heatmap of all differentially expressed genes between 6 canine mast cell tumour-derived fibroblasts (H346, H401, H402, H395, H1171 and H250) and two canine cancer cell lines (M5 and M25) demonstrating the clustering difference based on their molecular profile.

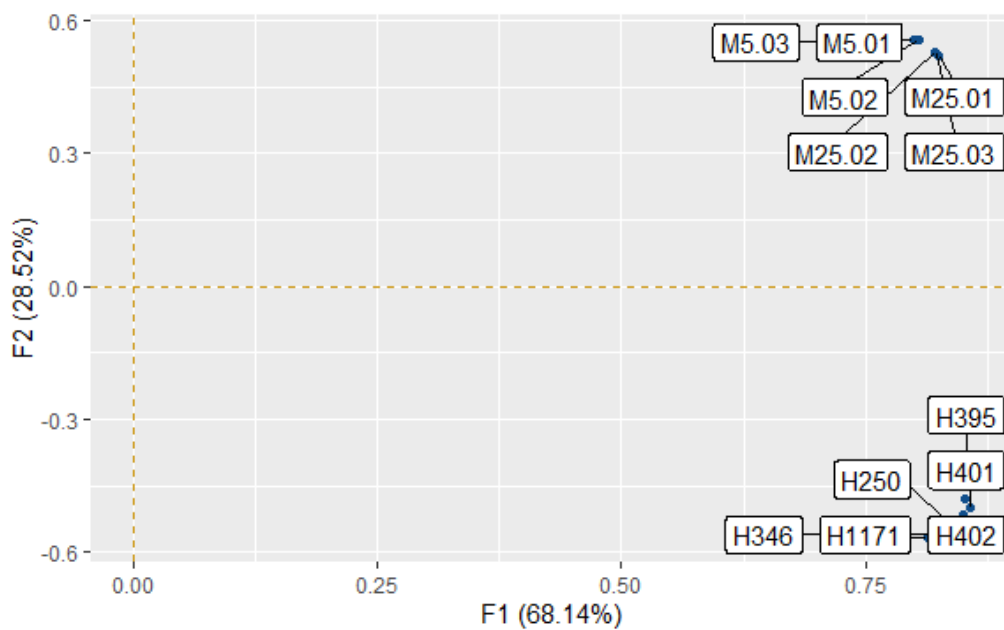

Figure S2. Perceptual Map from a PCA analysis based on the molecular profile of mast cell tumour-derived fibroblasts and canine cancer cells. First two principal components are shown exhibiting a clear separation between the fibroblasts and canine cancer cells based on their molecular profile.
